# Supplementary material
Source: PubMed Central journal article supplement (PMC2154474)
Supplement: supp_0710033104_10033Table2.pdf [file supp_0710033104_10033Table2.pdf]

**Table 2. Comparison of activation obtained in the present study (for additional data, see Table 1) with those obtained in other studies**

| Current Study      |                       |                               | Activations in other Studies |                  |                                 |
|--------------------|-----------------------|-------------------------------|------------------------------|------------------|---------------------------------|
| Area of activation | Talairach cords.      | Task                          | Paper                        | Talairach cords. | Task                            |
| L. IFG (9)         | -35,8,24              | 1/3>[0+(-1/3)]                | 20                           | -40,10,26        | Perception of mouth movements   |
|                    |                       |                               | SI1                          | -37,5,25         | Perception of biological motion |
| L. IFG (45)        | -47,23,15             | 1/3>[0+(-1/3)]                | SI2                          | -51,10,18        | imitation                       |
|                    |                       |                               | SI3                          | -48,12,22        | action observation              |
|                    |                       |                               | 20                           | -48,26,6         | Perception of mouth movements   |
|                    |                       |                               | SI4                          | -45,22,16        | Perception of speech movements  |
|                    |                       |                               | SI1                          | -41,14,18        | Perception of biological motion |
|                    |                       |                               | SI5                          | -53,10,26        | imitation                       |
|                    |                       |                               | 18                           | -50,12,12        | imitation                       |
|                    |                       |                               | SI6                          | -54,12,12        | movement imagery                |
| L. IFG (44)        | -50,1,11              | 1/3>[0+(-1/3)]                | SI2                          | -51,10,18        | imitation                       |
| L. PMd             | -42,0,45<br>-49,-8,39 | 1/3>[0+(-1/3)]                | SI7                          | -52,6,40         | observation of mouth actions    |
|                    |                       |                               | SI7                          | -40,-1,55        | observation of foot actions     |
|                    |                       |                               | SI8                          | -42,-4,43        | action observation & imitation  |
|                    |                       |                               | 20                           | -44,-4,42        | Perception of mouth movements   |
|                    |                       |                               | SI9                          | -38,-1,55        | Movement & movement imagery     |
|                    |                       |                               | SI9                          | -47,4, 48        | movement imagery                |
|                    |                       |                               | SI6                          | -42,3,51         | movement imagery                |
|                    |                       |                               | 16                           | -32,-2,50        | motor response selection        |
|                    |                       |                               | 16                           | -42,-10,52       | simple motor responses          |
| SI10               | ± 44,5,51             | complex motor responses       |                              |                  |                                 |
| R. STS/STG         | 58,-33,11             | 1/3>[0+(-1/3)]                | SI3                          | 64,-38,16        | action observation              |
|                    |                       |                               | SI3                          | 66,-38,18        | action observation              |
|                    |                       |                               | SI8                          | 67,-32,13        | action observation/imitation    |
|                    |                       |                               | SI11                         | 61,-35,9         | perception of face motion       |
|                    |                       |                               | SI4                          | 56,-29,9         | Perception of speech movements  |
|                    |                       |                               | 20                           | 58,-34,12        | Perception of mouth movements   |
|                    |                       |                               | 21                           | 57,-41,21        | Perception of biological motion |
| SI12               | 53,-36,6              | Perception of mouth movements |                              |                  |                                 |
| L. pMTG            | -60,-49,7             | 1/3>[0+(-1/3)]                | 20                           | -56,-44,2        | Perception of mouth movements   |
|                    |                       |                               | SI3                          | -58,-50,10       | action observation              |
|                    |                       |                               | SI6                          | -60,-57,6        | movement imagery                |

| Current Study      |                  |                                 | Activations in other Studies |                  |                                 |
|--------------------|------------------|---------------------------------|------------------------------|------------------|---------------------------------|
| Area of activation | Talairach cords. | Task                            | Refs.                        | Talairach cords. | Task                            |
| R. PHG             | 23,-37,-11       | 0>[1/3+(-1/3)]                  | 37                           | 23,-40,-7        | navigation                      |
|                    |                  |                                 | SI13                         | 26,-39,-12       | navigation                      |
| R. FG              | 39,-63,-5        | 1/3>[0+(-1/3)]                  | 20                           | 46,-62,-4        | Perception of mouth movements   |
|                    |                  |                                 | SI3                          | 44,-64,0         | action observation              |
|                    |                  |                                 | 21                           | 44,-69,-7        | Perception of biological motion |
|                    |                  |                                 | SI4                          | 41,-58,-2        | perception of speech motion     |
| SI14               | 46,-66,-6        | Perception of biological motion |                              |                  |                                 |
| L Cuneus           | -24,-78,14       | 1/3>[0+(-1/3)]                  | SI15                         | -22,-84,24       | Perception of biological motion |
| L. CCZ/SMA         | -3,-5,43         | 1/3>[0+(-1/3)]                  | 19                           | -5,-4,50         | movement imagery                |
|                    |                  |                                 | 19                           | -5,-8,38         | movement imagery                |
|                    |                  |                                 | SI16                         | -1,-1,49         | movement imagery                |
| L. CCZ/SMA         | -4 -26 41        | 1/3>[0+(-1/3)]                  | 17                           | -2,-21,42        | rhythmic arm movements          |
| L. RCZ             | -2,12,43         | 1/3>[0+(-1/3)]                  | 17                           | -2,12,43         | discrete arm movements          |
| L. Pos. cerebellum | -20,-63,-23      | 1/3>[0+(-1/3)]                  | SI4                          | -22,-52,-19      | Perception of speech movements  |
|                    |                  |                                 | SI17                         | -24,-57,-32      | Perception of geometrical forms |

Coordinates which were originally reported in MNI space were transformed into Talairach space. CCZ, caudal cingulate zone; FG, fusiform gyrus; IFG, inferior frontal gyrus; L, left; MTG, middle temporal gyrus; PHG, parahippocampal gyrus; PMd, dorsal premotor cortex; R, right; SMA, supplementary motor area; STG, superior temporal gyrus; STS, superior temporal sulcus. SI references are listed in *SI Text*. All other references are listed in the main text.
