# Supplementary material
Source: PubMed Central journal article supplement (PMC2154474)
Supplement: supp_0710033104_10033Table3.pdf [file supp_0710033104_10033Table3.pdf]

**Supporting Table 3. Significant clusters of activation obtained when each type of motion was contrasted with "rest"**

| Brain Region         | BA    | Side | 1/3>Rest    |      | 0>Rest      |      | -1/3>Rest   |      |
|----------------------|-------|------|-------------|------|-------------|------|-------------|------|
|                      |       |      | X Y Z       | Z    | X Y Z       | Z    | X Y Z       | Z    |
| MFG                  | 9     | L    | -15,43,21   | 5.99 |             |      |             |      |
|                      |       |      | -39,26,27   | 4.1  |             |      |             |      |
| IFG/precentral gyrus | 44    | R    | 51,12,9     | 7.53 | 46,14,6     | 4.42 | 48,11,6     | 3.71 |
| IFG                  | 45    | R    | 38,25,6     | 5.15 |             |      |             |      |
| PMd/M1               | 4/6   | L    | -44,-7,39   | 4.73 | -27,-15,46  | 4.52 | -22,-17,52  | 4.36 |
|                      |       |      |             |      | -40,-11,41  | 3.93 |             |      |
|                      | 4/6   | R    | 27,-20,48   | 5.07 | 26,-16,49   | 5.56 |             |      |
| PMv                  | 6     | R    | 48,2,20     | 4.87 | 58,-4,40    | 5.04 | 50,-6,40    | 4.94 |
|                      |       | L    | -45,-3,25   | 4.91 | -60-4,35    | 4.07 |             |      |
|                      |       |      |             |      | -49,-2,24   | 4.67 |             |      |
| RCZ/Pre-SMA          | 6,24  | R    | 10,3,46     | 5.78 | 13,9,47     | 6.35 |             |      |
|                      |       | L    | -1,12,42    | 4.88 | -10,15,43   | 4.32 |             |      |
| SMA                  | 6     | L    | -4,-17,50   | 4.87 |             |      |             |      |
| CCZ/SMA              |       | R    | 5,-2,49     | 5.78 | 7,-2,48     | 5.41 |             |      |
| CCZ                  | 24    | R    | 10,-3,30    | 3.72 |             |      |             |      |
| PCgG                 | 23,31 | L    | -9,-28,36   | 5.17 | -11,-32,35  | 5.44 |             |      |
|                      |       | R    | 10,-35,26   | 5.8  |             |      |             |      |
| AnC                  | 32    | R    | 6,22,30     | 3.88 |             |      |             |      |
| PcG/M1               | 3,4   | R    | 38,-17,48   | 4.7  | 39,-14,46   | 4.17 |             |      |
|                      |       | L    | -24,-17,49  | 6.53 |             |      |             |      |
| PcG                  | 40    | R    | 56,-25,18   | 3.96 |             |      |             |      |
| SPL,IPS              | 7     | L    |             |      | -31,-70,47  | 3.99 | -33,-73,49  | 4.65 |
|                      |       | R    |             |      |             |      | 35,-60,52   | 4.27 |
| IPL,IPS              | 40    | R    | 35,-47,35   | 6.54 | 35,-49,35   | 5.28 | 35,-45,35   | 5.18 |
|                      |       |      | 60,-35,22   | 4.98 |             |      |             |      |
|                      |       | L    | -31,-50,40  | 5.6  | -41,-47,32  | 5.55 | -44,-40,29  | 5.38 |
|                      |       |      | 42,-42,36   | 5.86 |             |      | -58,-41,46  | 5.0  |
| Precuneus            | 7,19  | R    | 19,-70,36   | 5.02 |             |      | 35,-60,52   |      |
|                      |       | L    | -15,-82,39  | 3.81 | -20,-80,47  | 3.32 | -31,-62,39  | 5.06 |
| STS/STG              | 22    | R    | 59,-40,16   | 5.29 | 59,-40,17   | 4.59 |             |      |
|                      |       |      | 68,-27,2    | 4.0  |             |      |             |      |
|                      |       | L    |             |      | -55,-41,17  | 5.50 | -52,-40,18  | 4.42 |
| PHG                  | 27    | R    |             |      | 21,-31,-10  | 4.84 | 19,-29,-3   | 3.88 |
| lingual gyrus        | 17,18 | R    | 21,-87,-3   | 4.76 |             |      |             |      |
| MOG/cuneus           | 18,19 | R    | 22,-86,16   | 4.27 | 22,-83,9    | 3.74 | 32,-84,1    | 5.21 |
|                      |       |      |             |      |             |      | 27,-88,23   | 4.21 |
| FG/IOG               | 18    | L    | -23,-91,-12 | 6.5  | -25,-90,-11 | 4.89 | -26,-89,-11 | 5.39 |
|                      |       | R    |             |      |             |      | 22,-86,-18  | 4.17 |
| FG                   | 19/37 | R    | 43,-55,-16  | 6.78 | 42,-60,-14  | 8.10 | 44,-60,-16  | 5.15 |
| FG                   |       | L    | -44,-65,-16 | 8.10 | -45,-63,-16 | 9.07 | -46,-62,-15 | 6.54 |
| insula               | 13    | R    |             |      |             |      | 37,20,11    | 3.77 |
|                      |       | L    | -32,23,7    | 5.04 | -33,-11,0   | 5.53 | -29,25,12   | 4.37 |
|                      |       |      | -55,-37,23  | 5.4  |             |      |             |      |
| claustrum            |       | L    | -33,2,-1    | 4.38 |             |      |             |      |
| medial GP            |       | R    | 17,-4,-5    | 5.02 |             |      |             |      |
| caudate              |       | R    | 11,2,11     | 3.53 |             |      |             |      |
| putamen              |       | L    | -13,10,-4   | 4.02 |             |      |             |      |
| putamen              |       | R    | 14,11,-3    | 4.2  |             |      |             |      |
| thalamus             |       | R    | 11,-16,0    | 4.92 |             |      |             |      |
|                      |       |      | 22,-29,-2   | 4.86 |             |      |             |      |
| pyramis              |       | L    | -12,-17,0   | 6.47 |             |      |             |      |
| P. Cereb(uvula).     |       | R    | 15,-78,-23  | 4.37 |             |      | 17,-76,-40  | 4.91 |
|                      |       | L    |             |      |             |      | -5,-79,-36  | 4.62 |
| P. Cereb(tuber).     |       | L    | -40,-57,-30 | 4.73 |             |      |             |      |
| P. Cereb (pyramis).  |       | L    | -22,-76,-31 | 4.64 |             |      | -23,-80,-33 | 4.11 |

---

For each cluster Talairach coordinates at the centre of gravity are specified along with the corresponding Brodmann area (BA) and the peak Z score.

AnC, anterior cingulate gyrus; CCZ, caudal cingulate zone; FG, fusiform gyrus; IFG, inferior frontal gyrus; GP, globus pallidus; IOG, inferior occipital gyrus; IPL, inferior parietal lobule; IPS, intraparietal sulcus; M1, primary motor cortex; MFG, middle frontal gyrus; MOG, middle occipital gyrus; P.Cereb: posterior cerebellum; PcG, posterior cingulate gyrus; PCgG, posterior cingulate gyrus, PHG, parahippocampal gyrus; PMd, dorsal premotor; PMv, ventral premotor; SMA, supplementary motor area; RCZ, rostral cingulate zone; SPL, superior parietal lobule; STG, superior temporal gyrus; STS, superior temporal sulcus; All areas are corrected for multiple comparisons at cluster level (at  $p < 0.05$ ). Minimum volume cluster size 112 voxels.
