# Supplementary material
Source: PubMed Central journal article supplement (PMC2154474)
Supplement: supp_0710033104_10033Table4.pdf [file supp_0710033104_10033Table4.pdf]

**Table 4. Significant clusters of activation obtained when each type of motion was contrasted with the other two types of motion (second control experiment)**

| <b>1/3 &gt; (0+2/3)</b>     |           |                        |          |                         |          |
|-----------------------------|-----------|------------------------|----------|-------------------------|----------|
|                             |           | <b>Left Hemisphere</b> |          | <b>Right Hemisphere</b> |          |
| <b>Region</b>               | <b>BA</b> | <b>X Y Z</b>           | <b>Z</b> | <b>X Y Z</b>            | <b>Z</b> |
| Middle frontal gyrus        | 46        | -47,42,23              | 5.03     |                         |          |
| Superior frontal gyrus      | 9         | -39,46,34              | 3.81     |                         |          |
| Superior frontal gyrus      | 10        | -21,56,23              | 3.72     |                         |          |
| Ventral premotor cortex     | 6         | -57,0,21               | 3.59     |                         |          |
| Dorsal premotor cortex      | 6         | -23,3,53               | 3.61     | 33,-11,66               | 3.28     |
|                             |           | -21,-3,65              | 4.38     |                         |          |
| Presupplementary motor area | 6         | -2,5,66                | 3.75     |                         |          |
|                             |           | -4,4,54                | 3.63     |                         |          |
| Pre/postcentral gyrus       | 3,4       | -52,-10,44             | 3.17     | 37,-32,53               | 5.34     |
|                             |           | -46,-18,53             | 4.21     |                         |          |
| Postcentral gyrus           | 1,2,3,5   | -24,-38,68             | 4.37     |                         |          |
| Supramarginal gyrus/IPL     | 40        | -52,-46,34             | 3.53     | 42,-39,54               | 4.49     |
| Superior parietal lobule    | 7         | -32,-54,52             | 3.5      | 18,-47,58               | 3.75     |
| Precuneus                   | 7         | -19,-69,37             | 3.49     | 3,-54,49                | 5.02     |
|                             |           | -14,-60,56             | 3.28     | 4,-78,49                | 3.72     |
| Cuneus                      | 17        | -5,-68,9               | 3.54     | 7,-77,10                | 3.91     |
| Lingual gyrus               | 17        | -3,-93,0               | 3.53     |                         |          |
| CCZ/PcG                     | 31        | -11,-35,42             | 4.18     |                         |          |
| Insula                      | 13        | -31,23,10              | 3.98     |                         |          |
| Putamen                     |           | -31,-10,7              | 3.7      | 25,8,3                  | 3.76     |
|                             |           | -22,12,0               | 3.56     |                         |          |
| Thalamus (pulvinar)         |           |                        |          | 13,-27,5                | 3.9      |
| <b>0 &gt; (1/3+2/3)</b>     |           |                        |          |                         |          |
|                             |           | <b>Left Hemisphere</b> |          | <b>Right Hemisphere</b> |          |
| <b>Region</b>               | <b>BA</b> | <b>X Y Z</b>           | <b>Z</b> | <b>X Y Z</b>            | <b>Z</b> |
| Middle frontal gyrus        | 10        | -30,55,7               | 4.19     |                         |          |
| Uncus (adj. to PHG)         | 20        | -29,-15,-27            | 3.68     |                         |          |
| <b>2/3 &gt; (1/3+0)</b>     |           |                        |          |                         |          |
|                             |           | <b>Left Hemisphere</b> |          | <b>Right Hemisphere</b> |          |
| <b>Region</b>               | <b>BA</b> | <b>X Y Z</b>           | <b>Z</b> | <b>X Y Z</b>            | <b>Z</b> |
| Inferior parietal lobule    | 40        |                        |          | 55,-28,25               | 3.85     |
| Superior temporal gyrus     | 42        |                        |          | 58,-33,13               | 3.63     |

| 1/3 > (0+2/3)           |    |                 |      |                  |      |
|-------------------------|----|-----------------|------|------------------|------|
| Region                  | BA | Left Hemisphere |      | Right Hemisphere |      |
|                         |    | X Y Z           | Z    | X Y Z            | Z    |
| Middle temporal gyrus   | 21 |                 |      | 55,-4,-22        | 4.67 |
| Middle temporal gyrus   | 19 |                 |      | 53,-63,14        | 3.61 |
| Superior temporal gyrus | 38 | -34,16,-36      | 4.05 |                  |      |
|                         |    | -45,14,-28      | 4.13 |                  |      |
| Lingual gyrus           | 19 |                 |      | 26,-73,-3        | 4.4  |
| Lateral globus pallidus |    | -18,-3,9        | 3.59 |                  |      |

For each cluster, Talairach coordinates at the center of gravity are specified along with the corresponding Brodmann area (BA) and the peak Z score. CCZ, caudal cingulate zone; PcG, posterior cingulate gyrus; PHG, parahippocampal gyrus. All areas are corrected for multiple comparisons at cluster level (at  $P < 0.05$ ). Minimum volume cluster size, 134 voxels.
