# Supplementary material
Source: PubMed Central journal article supplement (PMC2154474)
Supplement: supp_0710033104_10033Table5.pdf [file supp_0710033104_10033Table5.pdf]

**Table 5. Significant clusters of activation obtained in pair-wise comparisons between the different types of motion (main experiment)**

| 1/3>-1/3                                |       |                          |              |                        |              |
|-----------------------------------------|-------|--------------------------|--------------|------------------------|--------------|
|                                         |       | Left Hemisphere          |              | Right Hemisphere       |              |
| Region                                  | BA    | X Y Z                    | Z            | X Y Z                  | Z            |
| Superior frontal gyrus                  | 9     | -14,45,21                | 5.05         |                        |              |
| Inferior frontal gyrus                  | 9     | -35,9,25                 | 4.62         |                        |              |
| Inferior frontal gyrus                  | 45-47 | -49,26,8                 | 6.19         |                        |              |
| Inferior frontal gyrus                  | 44    | -50,5,8                  | 3.81         | 55,12,10               | 3.43         |
| Ventromedial PFC                        | 10,11 | -32,38,7                 | 2.98         |                        |              |
| SMA                                     | 6     | -4,-19,49                | 4.3          | 1,-16,46               | 5.88         |
| Ventral premotor cortex                 | 6     | -35,-4,40                | 4.66         |                        |              |
| Middle frontal gyrus                    | 9     |                          |              | 30,31,24               | 4.13         |
| Precentral gyrus                        | 9     | -37,15,36                | 4.4          |                        |              |
| Precentral gyrus (M1)                   | 4     | -34,-22,53<br>-23,-20,50 | 4.28<br>3.62 |                        |              |
| Postcentral gyrus                       | 3,40  |                          |              | 22,-27,49<br>38,-28,40 | 3.18<br>3.47 |
| Inferior partial lobule                 | 40    | -35,-42,43               | 3.28         |                        |              |
| Supramarginal gyrus                     | 40    | -56,-46,30               | 4.23         |                        |              |
| RCZ/CCZ                                 | 24    | -2,4,37                  | 5.88         |                        |              |
| Posterior cingulate gyrus               | 31    | -9,-42,38                | 4.39         | 11-31,39               | 4.46         |
| Middle temporal gyrus                   | 21,39 | -61,-50,6 -<br>48,-61,24 | 4.79<br>4.26 |                        |              |
| Superior temporal gyrus                 | 22,39 | -59,-59,20               | 4.21         | 61,-36,17              | 4.11         |
| Parahippocampal gyrus                   |       | -28,-33,-5               | 4.66         | 37,-21,-13             | 3.87         |
| Lingual gyrus                           | 17-19 | -13,-74,-2               | 5.17         |                        |              |
| Cuneus                                  | 17    | -22,-76,14               | 4.45         | 11,-82,3               | 5.3          |
| Fusiform gyrus                          | 18,19 | -38,-74,-12              | 3.8          | 37,-65,-3              | 4.76         |
| Insula                                  | 13    | -39,5,-4                 | 4.47         |                        |              |
| Posterior cerebellum<br>(declive/uvula) |       | -22,-62,-20              | 5.01         |                        |              |
| -1/3>1/3                                |       |                          |              |                        |              |
| No activation obtained                  |       |                          |              |                        |              |
| 1/3>0                                   |       |                          |              |                        |              |
|                                         |       | Left Hemisphere          |              | Right Hemisphere       |              |
| Region                                  | BA    | X Y Z                    | Z            | X Y Z                  | Z            |
| Superior frontal gyrus                  | 9     |                          |              | 22,62,29               | 3.92         |

|                              |           |                        |          |                         |          |
|------------------------------|-----------|------------------------|----------|-------------------------|----------|
| Inferior frontal gyrus       | 47        |                        |          | 26,20,-25               | 4.94     |
| Inferior frontal gyrus       | 45        | -48,22,18              | 4.33     | 49,27,6                 | 3.45     |
| Ventromedial PFC             | 10,11     | -26,43,2               | 6.83     |                         |          |
| Ventral premotor cortex      | 6         | -50,-7,39              | 4.79     |                         |          |
| Inferior parietal lobule     | 40        | -33,-43,44             | 3.37     |                         |          |
| Middle occipital gyrus       | 19        | -27,-80,12             | 4.28     |                         |          |
| Fusiform gyrus               | 37        |                        |          | 38,-61,-14              | 4.58     |
| Caudate                      |           | -4,2,16                | 5.78     | 9,-2,23                 | 4.0      |
| Posterior cerebellum (uvula) |           |                        |          | -20,-66,-24             | 4.73     |
| <b>0&gt;1/3</b>              |           |                        |          |                         |          |
|                              |           | <b>Left Hemisphere</b> |          | <b>Right Hemisphere</b> |          |
| <b>Region</b>                | <b>BA</b> | <b>X Y Z</b>           | <b>Z</b> | <b>X Y Z</b>            | <b>Z</b> |
| Parahippocampal gyrus        |           |                        |          | 22,-38,-11              | 4.97     |

For each cluster, Talairach coordinates at the center of gravity are specified along with the corresponding Brodmann area (BA) and the peak Z score. CCZ, caudal cingulate zone; PFC, prefrontal cortex; RCZ, rostral cingulate zone; SMA, supplementary motor area; STG, superior temporal gyrus. All areas are corrected for multiple comparisons at cluster level (at  $P < 0.05$ ). Minimum volume cluster size, 134 voxels.
