# Supplementary material
Source: PubMed Central journal article supplement (PMC2154474)
Supplement: supp_0710033104_10033Table6.pdf [file supp_0710033104_10033Table6.pdf]

**Table 6. Clusters of activation obtained when each type of motion was contrasted with the other two types of motion (while no button-pressing task was performed)**

| <b>1/3 &gt; [0+(-1/3)]</b>   |           |                        |          |                         |          |
|------------------------------|-----------|------------------------|----------|-------------------------|----------|
|                              |           | <b>Left Hemisphere</b> |          | <b>Right Hemisphere</b> |          |
| <b>Region</b>                | <b>BA</b> | <b>X Y Z</b>           | <b>Z</b> | <b>X Y Z</b>            | <b>Z</b> |
| SMA                          | 6         |                        |          | 1,-18,52                | 4.28     |
| PMd                          | 6         | -14,-19,70             | 4.6      | 26,-15,70               | 4.73     |
| M1/PMd                       | 4/6       | -48,-10,41             | 4.14     |                         |          |
| M1                           | 4         |                        |          | 27,-24,69               | 5.79     |
| CCZ                          | 31        |                        |          | 12,-29,37               | 4.05     |
| Precuneus                    | 7         | -3,-33,44              | 4.69     | 12,-55,50               | 5.08     |
| IPL                          | 40        | -57,-29,33             | 4.81     | 53,-30,38               | 4.19     |
|                              |           | -37,-53,53             | 4.37     | 43,-42,55               | 5.03     |
|                              |           | -31,-39,57             | 4.12     |                         |          |
| Lingual gyrus                | 18        | -3,-67,-2              | 6.77     |                         |          |
| Fusiform gyrus               | 19        |                        |          | 25,-85,-12              | 4.1      |
| Posterior cerebellum         |           | -41,-66,-19            | 5.37     |                         |          |
| Anterior cerebellum (culmen) |           | -30,-57,-23            | 3.87     |                         |          |
| <b>0 &gt; [1/3+(-1/3)]</b>   |           |                        |          |                         |          |
|                              |           | <b>Left Hemisphere</b> |          | <b>Right Hemisphere</b> |          |
| <b>Region</b>                | <b>BA</b> | <b>X Y Z</b>           | <b>Z</b> | <b>X Y Z</b>            | <b>Z</b> |
| Middle temporal gyrus        | 21        | -57,-28,-3             | 4.38     |                         |          |
| <b>-1/3 &gt; (1/3+0)</b>     |           |                        |          |                         |          |
| No activations obtained      |           |                        |          |                         |          |

For each cluster, Talairach coordinates at the center of gravity are specified along with the corresponding Brodmann area (BA) and the peak Z score. CCZ, caudal cingulate zone; IPL, inferior parietal lobule; M1, primary motor cortex; PMd, dorsal premotor cortex; SMA, supplementary motor area; All areas are corrected for multiple comparisons at cluster level (at  $P < 0.05$ ). Minimum volume cluster size, 81 voxels.
